# Supplementary material for: A Comprehensive Assessment of Catalytic Performances of Mn2O3 Nanoparticles for Peroxymonosulfate Activation during Bisphenol A Degradation
Source: MDPI journal article supplement (doi:10.3390/catal11080993), 2021-08-18
Supplement: s1 [file s1]

## Supplementary Information

For

### A Comprehensive Assessment of Catalytic Performances of Mn<sub>2</sub>O<sub>3</sub> Nanoparticles for Peroxymonosulfate Activation during Bisphenol A Degradation

Li Chen<sup>1,2</sup>, Wanyi Fu<sup>1,3,\*</sup>, Congyu Hou<sup>1,2</sup>, Yulong Yang<sup>1,2</sup> and Xihui Zhang<sup>1,2,\*</sup>

1 Tsinghua Shenzhen International Graduate School, Tsinghua University, Shenzhen 518055, Guangdong, China

2 School of Environment, Tsinghua University, Beijing 100084, China

3 Tsinghua-Berkeley Shenzhen Institute, Tsinghua University, Shenzhen 518055, Guangdong, China

\*Corresponding authors: X. Zhang, zhangxh@sz.tsinghua.edu.cn; W. Fu, fu.wanyi@sz.tsinghua.edu.cn

#### 2.1 Reagents

Bisphenol A (BPA,  $\geq 99\%$ , GC grade), Potassium peroxymonosulfate (PMS, 2KHSO<sub>5</sub>•KHSO<sub>4</sub>•K<sub>2</sub>SO<sub>4</sub>), Erythromycin, Ofloxacin, Naproxen, Paracetamol, furfuryl alcohol (FFA), *tert*-butanol (TBA), *p*-benzoquinone (*p*-BQ), 5,5-dimethyl-1-pyrrolidine N-oxide (DMPO), 2,2,6,6-tetramethyl-4-piperidinol (TMP), sodium pyrophosphate (PP), ammonia, manganese acetate (Mn(OAc)<sub>3</sub>), humic acid, sodium hydroxide (NaOH), sodium sulfate (Na<sub>2</sub>SO<sub>4</sub>), sodium nitrate (NaNO<sub>3</sub>), sodium chloride (NaCl), calcium chloride (CaCl<sub>2</sub>) were purchased from Shanghai Aladdin Chemistry Co., Ltd., China. Anhydrous manganese sulfate (MnSO<sub>4</sub>) and magnesium chloride (MgCl<sub>2</sub>) were obtained from Shanghai Macklin Biochemical Co., Ltd., China. Hydrochloric acid (HCl) and nitric acid (HNO<sub>3</sub>) were purchased from Dongguan Dongjiang Chemical reagent Co., Ltd (Guangdong, China). Methanol (99.9%) was supplied by Merck KgaA (Germany). Formic acid (100%) was obtained by Honeywell (Fluka, Germany). Isopropanol ( $\geq 99.9\%$ ) and acetonitrile ( $\geq 99.9\%$ ) were supplied by Saan Chemical Technology Co., Ltd (Shanghai, China). Methanol (MeOH), isopropanol, acetonitrile, formic acid, and ammonia used for HPLC-MS/MS analysis are of HPLC grade. All the other chemicals and reagents were at least of analytical grade and used

without further purification. Ultrapure water (UPW) was produced using a Milli-Q system (Millipore, USA).

**Table S1.** Water quality parameters of real waters.

| Parameters                            | Ultrapure water<br>(UPW) | River water<br>(RW) | Secondary effluent<br>(SE) | Tap water<br>(TW) |
|---------------------------------------|--------------------------|---------------------|----------------------------|-------------------|
| pH                                    | 6.83                     | 8.17                | 7.05                       | 6.96              |
| COD (mg L <sup>-1</sup> )             | -                        | 29.26               | 38.40                      | 6.03              |
| SS (mg/L)                             | -                        | 29.50               | 4.50                       | 2.50              |
| TOC (mg/L)                            | -                        | 5.75                | 9.48                       | 0.74              |
| UV <sub>254</sub> (cm <sup>-1</sup> ) | -                        | 0.06                | 0.11                       | 0.02              |
| NH <sub>3</sub> -N(mg/L)              | -                        | 0.19                | 0.11                       | 0.05              |
| TN (mg/L)                             | -                        | 1.67                | 9.09                       | 0.15              |
| TP (mg/L)                             | -                        | 0.07                | 0.16                       | 0.05              |
| Cl <sup>-</sup> (mg/L)                | -                        | 7.89                | 89.45                      | 7.50              |
| Turbidity                             | -                        | 10.50               | 0.67                       | 0.12              |
| DO (mg/L)                             | 6.82                     | 9.26                | 5.74                       | 7.59              |

Note: “-” stands for undetected.

**Table S2** Linear equations and R<sup>2</sup> of the reaction processes under different conditions

| Different PMS dosages |                       |                | Different Mn <sub>2</sub> O <sub>3</sub> dosages |                       |                |
|-----------------------|-----------------------|----------------|--------------------------------------------------|-----------------------|----------------|
| Dosage<br>(mM)        | Equations             | R <sup>2</sup> | Dosage<br>(g/L)                                  | Equations             | R <sup>2</sup> |
| 0.01                  | y = -0.0441x - 0.1725 | 0.9276         | 0.01                                             | y = -0.0070x - 0.0132 | 0.9543         |
| 0.02                  | y = -0.0545x - 0.0257 | 0.9236         | 0.05                                             | y = -0.0553x + 0.0259 | 0.9944         |
| 0.03                  | y = -0.0570x - 0.1024 | 0.9791         | 0.1                                              | y = -0.1088x - 0.0483 | 0.9984         |
| 0.05                  | y = -0.0698x - 0.1702 | 0.9685         | 0.2                                              | y = -0.5402x - 0.0557 | 0.9922         |
| 0.1                   | y = -0.1136x - 0.0304 | 0.9973         | 0.3                                              | y = -0.7500x + 0.4852 | 0.9908         |
| 0.3                   | y = -0.1360x - 0.1596 | 0.9369         |                                                  |                       |                |
| 0.5                   | y = -0.0906x - 0.195  | 0.9720         |                                                  |                       |                |
| Different initial pH  |                       |                | Different BPA concentrations                     |                       |                |
| Value                 | Equations             | R <sup>2</sup> | Concentration<br>(mg/L)                          | Equations             | R <sup>2</sup> |
| 4.0                   | y = -0.4391x + 0.2119 | 0.9920         | 0.1                                              | y = -0.7120x - 0.5416 | 0.9320         |
| 7.0                   | y = -0.5402x - 0.0557 | 0.9922         | 1.0                                              | y = -0.6852x - 0.0248 | 0.9974         |
| 9.0                   | y = -0.9287x + 0.2548 | 0.9863         | 10                                               | y = -0.5402x - 0.0557 | 0.9922         |
| 10.8                  | y = -0.2315x - 0.0604 | 0.9979         | 20                                               | y = -0.1064x - 0.1942 | 0.9849         |
|                       |                       |                | 30                                               | y = -0.0653x - 0.2087 | 0.9776         |

**Table S3.** Identified main TPs of BPA by ESI analysis.

| No. | Compound name                                                      | Tentative structure                                                                   | Molecular weight (m/z) |
|-----|--------------------------------------------------------------------|---------------------------------------------------------------------------------------|------------------------|
| P0  | Bisphenol A                                                        | 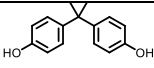    | 228                    |
| P1  | 4-(2-phenylpropan-2-yl)phenol                                      |     | 212                    |
| P2  | (4-hydroxyphenyl)(phenyl)methanone                                 |     | 198                    |
| P3  | propane-2,2-diyl dibenzene                                         |     | 196                    |
| P4  | 2,2-diphenylethen-1-one                                            |     | 194                    |
| P5  | 4-(2-(4-hydroxyphenyl)propan-2-yl)benzene-1,2-diol                 |     | 244                    |
| P6  | 4-(2-(4-hydroxyphenyl)propan-2-yl)cyclohexa-3,5-diene-1,2-dione    |     | 242                    |
| P7  | (2E,4Z)-3-(2-(4-hydroxyphenyl)propan-2-yl)hexa-2,4-dienedioic acid |   | 276                    |
| P8  | [1,1'-biphenyl]-3,3',4,4'-tetraol                                  |   | 218                    |
| P9  | [1,1'-biphenyl]-3,3',4,4',5-pentaol                                |   | 234                    |
| P10 | 4-(prop-1-en-2-yl) phenol                                          |   | 134                    |
| P11 | 2-(4-hydroxyphenyl)-propanol-2-ol                                  |   | 152                    |
| P12 | hex-1-en-3-ol                                                      |   | 100                    |
| P13 | hexa-1,5-dien-3-ol                                                 |   | 98                     |
| P14 | hexa-1,5-diene-3,4-diol                                            |  | 114                    |
| P15 | succinic acid                                                      |   | 118                    |

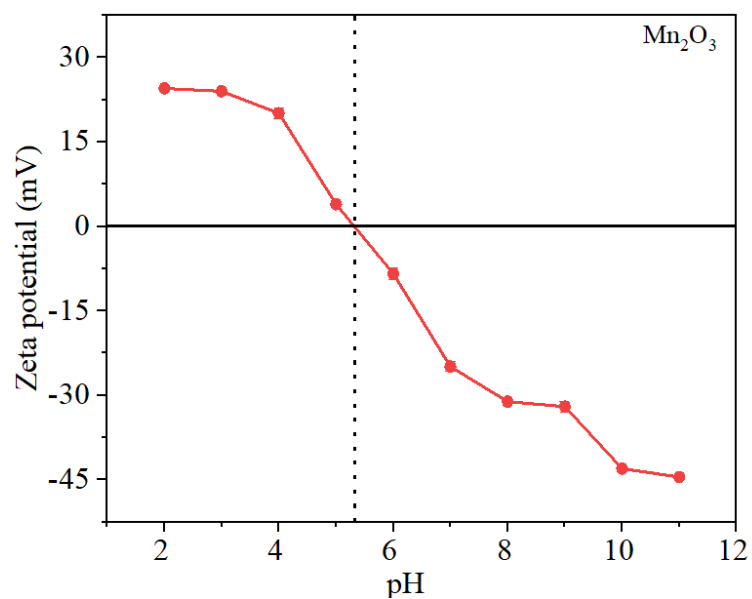

**Fig. S1.** Zeta potential vs. pH curve of  $\text{Mn}_2\text{O}_3$ .

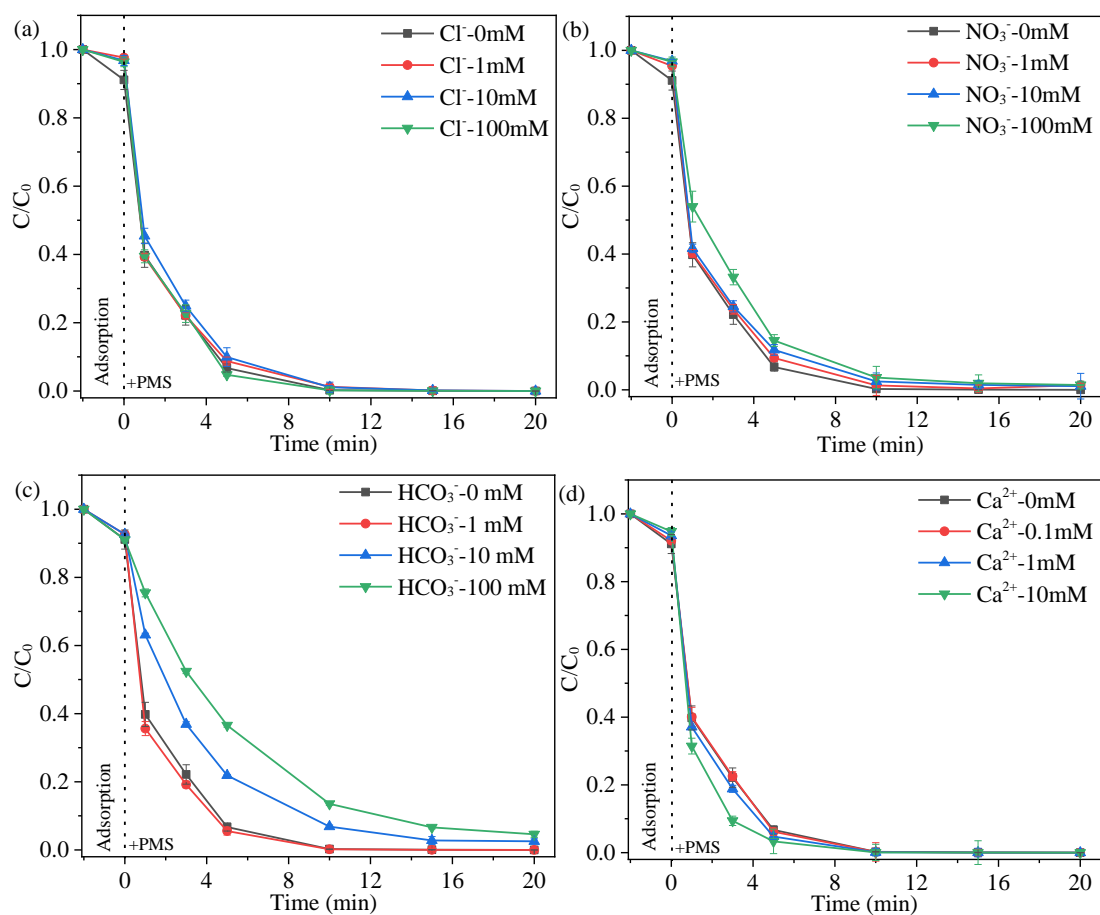

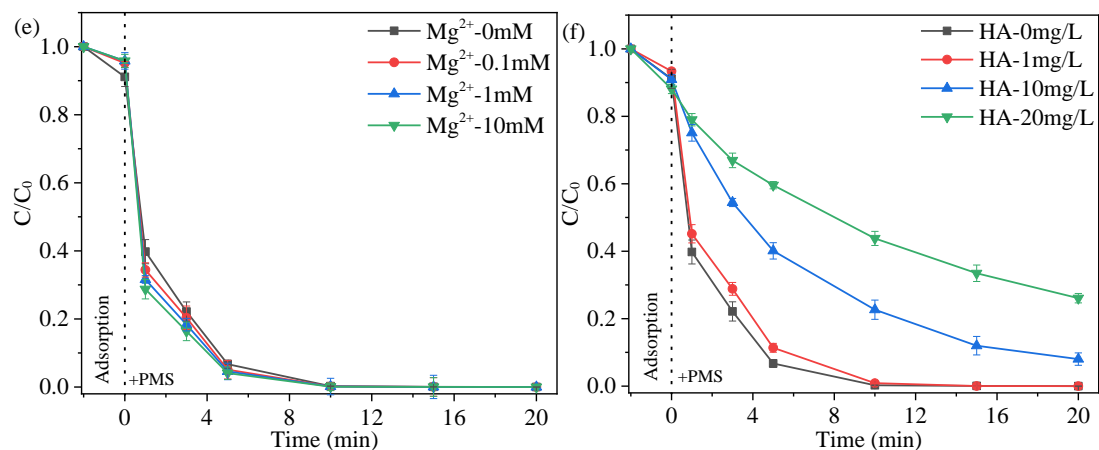

**Fig. S2.** Effects of (a)  $Cl^-$ , (b)  $NO_3^-$ , (c)  $HCO_3^-$ , (d)  $Ca^{2+}$ , (e)  $Mg^{2+}$  and (f) HA on BPA removal efficiency. Reaction condition:  $[BPA]_0 = 10$  mg/L,  $[PMS]_0 = 0.10$  mM,  $[Mn_2O_3]_0 = 0.2$  g/L, initial pH =  $7.0 \pm 0.2$ .

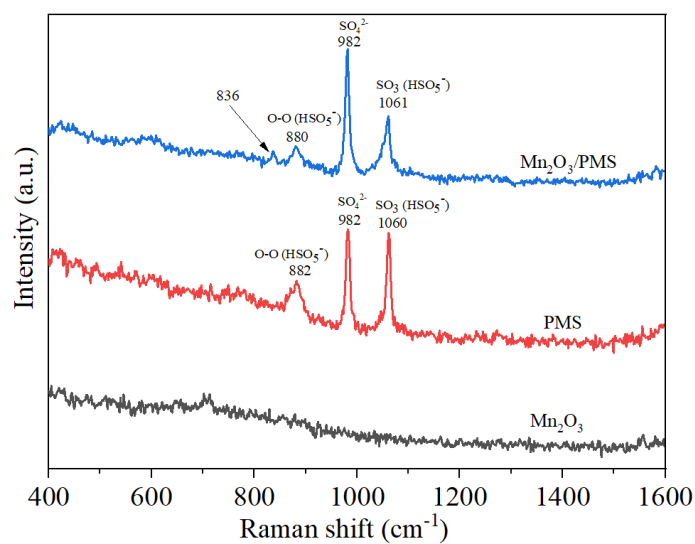

**Fig. S3.** *In-situ* Raman spectra of PMS, the commercial  $Mn_2O_3$  and bulk  $Mn_2O_3/PMS$ .

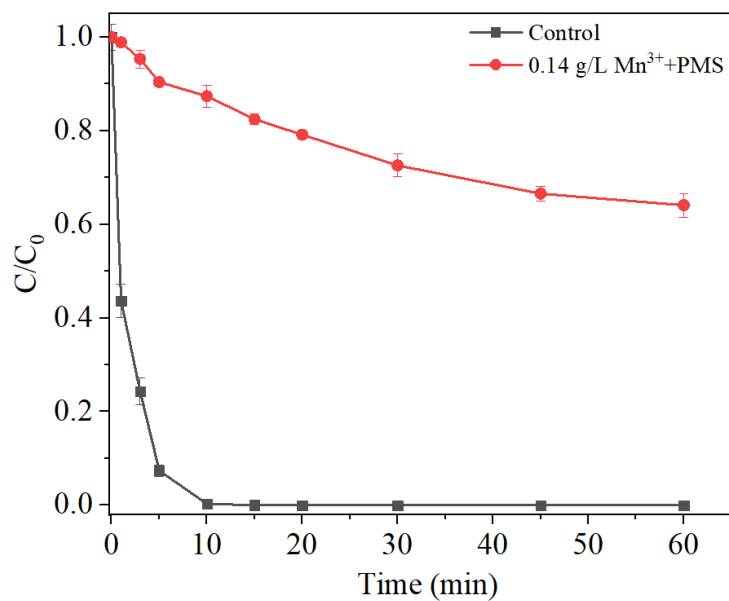

**Fig. S4.** Homogeneous and heterogeneous catalysis in the degradation of BPA.

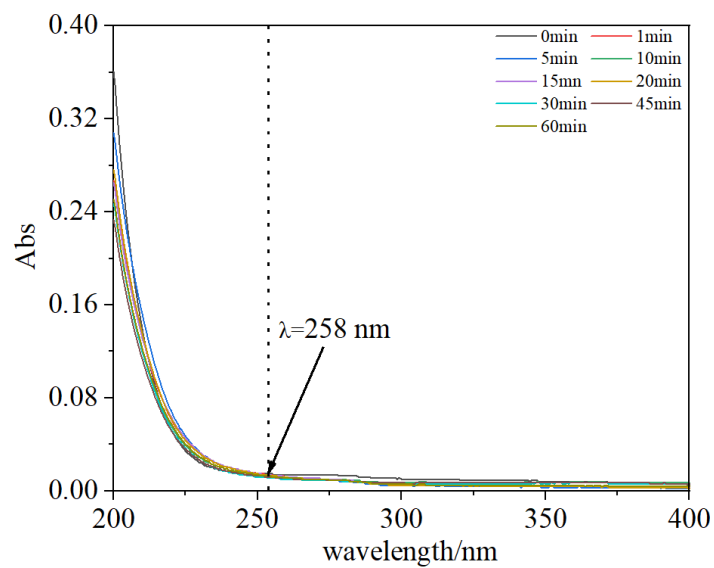

**Fig. S5.** UV-Vis spectra for Mn³⁺-PP in the reaction solution of the Mn₂O₃/PMS.

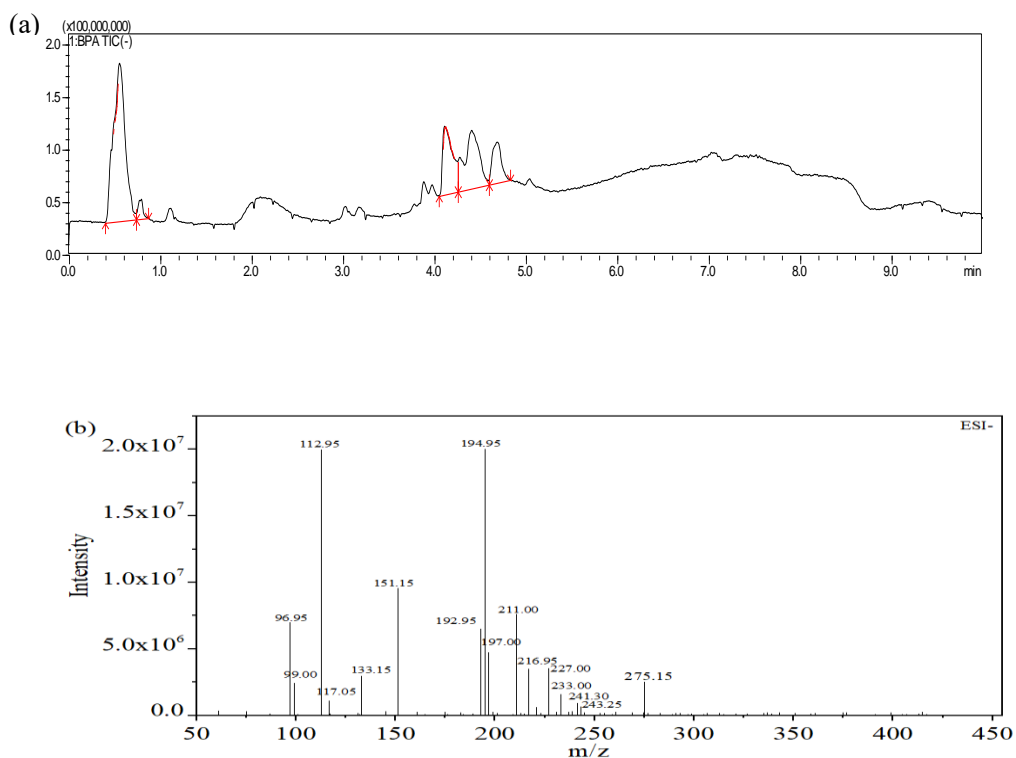

**Fig. S6.** The total ion current (TIC) chromatogram of TPs and BPA (a); mass spectra of the TPs of BPA detected in our study (b).

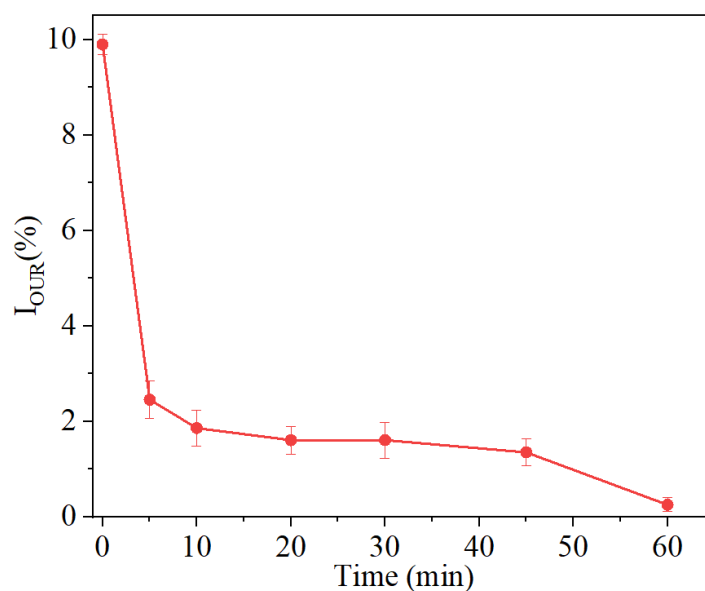

**Fig. S7.** Changes in toxicity with reaction time in the  $\text{Mn}_2\text{O}_3/\text{PMS}$  system. Reaction condition:  $[\text{BPA}]_0 = 10 \text{ mg/L}$ ,  $[\text{PMS}]_0 = 0.10 \text{ mM}$ ,  $[\text{Mn}_2\text{O}_3]_0 = 0.2 \text{ g/L}$ , initial  $\text{pH} = 7.00$ .  $I_{\text{OUR}}$  is the inhibition rate calculated by the formula as below:

$$\text{OUR}(\text{mg/L} \cdot \text{h}) = (\text{DO}_0 - \text{DO}_t)/t$$

$$I_{OUR}(\%) = \frac{OUR_b - OUR_s}{OUR_b} \times 100$$

where OUR is the oxygen uptake rate (mg/(L·h)), and  $DO_0$  and  $DO_s$  are the concentrations of dissolved oxygen in the slurry at 0 min and t min. Moreover, the  $OUR_s$  are the OUR in the reaction samples, and the  $OUR_b$  stands for the OUR in the blank sample.  $I_{OUR}$  is the inhibition rate as expressed as a percentage.

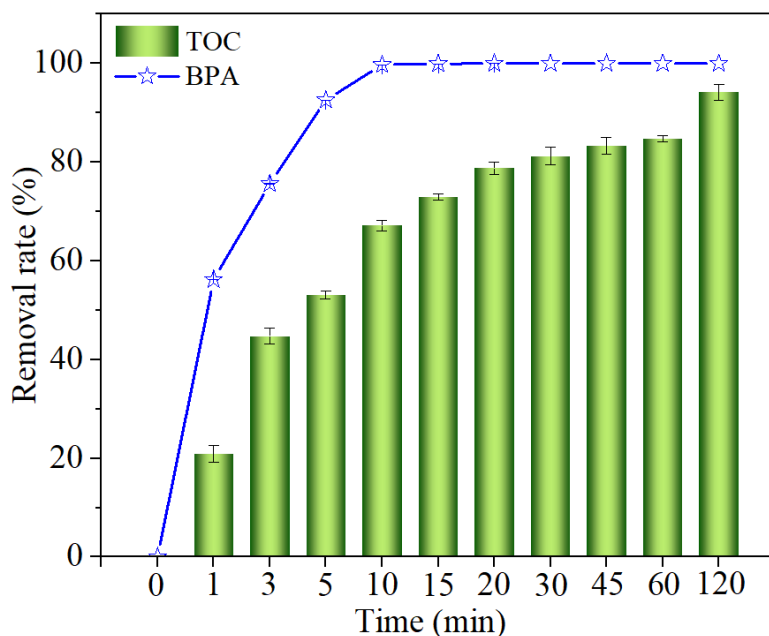

**Fig. S8.** TOC removal of BPA by  $Mn_2O_3$ /PMS system. Reaction condition:  $[BPA]_0 = 10$  mg/L,  $[PMS]_0 = 0.10$  mM,  $[Mn_2O_3]_0 = 0.2$  g/L, initial pH = 7.00.

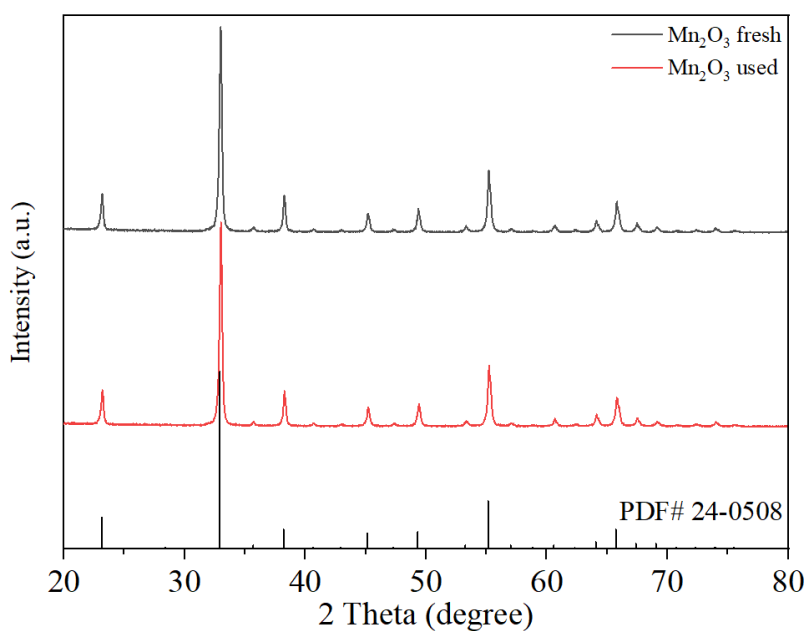

**Fig. S9.** XRD spectrum of the fresh and used commercial  $Mn_2O_3$ .
